# Supplementary material for: A computational study on CO2 electrochemical reduction on two dimensional metal-1,2,3,4,5,6,7,8,9,10,11,12-perthiolated coronene frameworks
Source: Royal Society of Chemistry journal article supplement (doi:10.1039/d2nj05005f), 2022-12-09
Supplement: d2nj05005f1.pdf [file d2nj05005f1.pdf]

## Supporting Information

### **A computational study on CO<sub>2</sub> electrochemical reduction on the two dimensional metal -1,2,3,4,5,6,7,8,9,10,11,12-perthiolated coronene frameworks**

Haoyan Zhang,<sup>a,b</sup> Lin Cheng,<sup>a,\*</sup> Kai Li,<sup>b</sup> Ying Wang,<sup>b</sup> Wencheng Wang<sup>c,\*</sup>

*<sup>a</sup>College of Chemical Engineering, Inner Mongolia University of Technology, Inner Mongolia Key Laboratory of Theoretical and Computational Chemistry Simulation, Hohhot 010051, P. R. China*

*<sup>b</sup>State Key Laboratory of Rare Earth Resource Utilization, Changchun Institute of Applied Chemistry, Chinese Academy of Sciences, Changchun 130022, P. R. China.*

*<sup>c</sup>Radiotherapy Laboratory, Jilin Cancer Hospital, Changchun 130012, P. R. China*

\*Corresponding authors. [lcheng1983@aliyun.com](mailto:lcheng1983@aliyun.com); [wencheng.w@163.com](mailto:wencheng.w@163.com).

**Table S1.** The calculated metal-S bond distances, lattice parameters  $a$ , adsorption energies of CO<sub>2</sub>, and the calculated U values.

|      | TM-S bond length (Å)    | $a$ (Å) | $E_{\text{ads}}$ | U    |
|------|-------------------------|---------|------------------|------|
| Sc   | 2.43, 2.43, 2.43, 2.43  | 14.37   | -0.09            | 0.08 |
| Ti   | 2.40, 2.39, 2.40, 2.40  | 14.27   | -0.10            | 3.97 |
| V    | 2.34, 2.34, 2.34, 2.34  | 14.11   | -0.49            | 4.60 |
| Cr   | 2.37, 2.37, 2.37, 2.37  | 14.15   | -0.14            | 4.70 |
| Mn   | 2.37, 2.37, 2.37, 2.37  | 14.10   | -0.14            | 5.52 |
| Fe   | 2.23, 2.23, 2.23, 2.23  | 13.79   | -0.15            | 4.29 |
| Co   | 2.19, 2.19, 2.19, 2.19  | 13.69   | -0.14            | 4.97 |
| Ni   | 2.11, 2.12, 2.11, 2.11  | 13.54   | -0.41            | 5.54 |
| Cu   | 2.22, 2.22, 2.22, 2.22  | 13.69   | -0.13            | 7.52 |
| Zn   | 2.27, 2.28, 2.28, 2.28, | 13.81   | -0.15            | 5.67 |
| Y    | 2.61, 2.61, 2.61, 2.61  | 14.82   | -0.64            | 2.60 |
| Zr   | 2.52, 2.48, 2.52, 2.49  | 14.45   | -1.72            | 3.58 |
| Nb   | 2.43, 2.33, 2.43, 2.33  | 14.27   | -1.07            | 1.89 |
| Mo   | 2.39, 2.37, 2.38, 2.38  | 14.22   | -0.25            | 2.37 |
| Ru   | 2.26, 2.26, 2.25, 2.26  | 13.91   | -0.50            | 2.50 |
| Rh   | 2.30, 2.18, 2.30, 2.18  | 13.77   | -0.95            | 3.09 |
| Pd   | 2.28, 2.28, 2.28, 2.28  | 13.85   | -0.41            | 1.77 |
| Ag   | 2.43, 2.43, 2.43, 2.43  | 14.60   | -0.13            | 3.39 |
| Sc-O | 2.76, 2.76, 2.76, 2.76  | 14.37   | -0.21            | 0.08 |
| Ti-O | 2.55, 2.54, 2.54, 2.54  | 14.27   | -0.16            | 3.97 |
| Zr-O | 2.68, 2.69, 2.71, 2.70  | 14.45   | -0.19            | 3.58 |
| Nb-O | 2.53, 2.51, 2.51, 2.49  | 14.27   | -0.13            | 1.89 |
| Mo-O | 2.43, 2.43, 2.43, 2.44  | 14.22   | -0.27            | 2.37 |

**Table S2.** Standard dissolution potentials ( $U_M^0$ , in V) of bulk metals and the calculated dissolution potentials ( $U_{\text{dis}}$ , in V) of TM for  $\text{TM} + n\text{H}^+ \leftrightarrow \text{TM}^{n+} + n/2\text{H}_2$ , at  $\text{pH}=0$ .

|      | $E_M$ | Formation energy | $U_M^0$ | n | $U_{\text{diss}}$ |
|------|-------|------------------|---------|---|-------------------|
| Sc   | -6.34 | -3.61            | -2.08   | 3 | -0.88             |
| Ti   | -5.16 | -2.75            | -1.63   | 2 | -0.25             |
| V    | -5.66 | -2.00            | -1.18   | 2 | -0.18             |
| Cr   | -6.04 | -2.31            | -0.91   | 2 | 0.25              |
| Mn   | -6.57 | -1.71            | -1.19   | 2 | -0.33             |
| Fe   | -6.56 | -0.87            | -0.45   | 2 | -0.01             |
| Co   | -3.81 | -2.10            | -0.28   | 2 | 0.77              |
| Ni   | -2.99 | -1.64            | -0.26   | 2 | 0.56              |
| Cu   | -2.38 | -0.56            | 0.34    | 2 | 0.62              |
| Zn   | -0.34 | -1.73            | -0.76   | 2 | 0.11              |
| Y    | -5.77 | -3.01            | -2.37   | 3 | -1.37             |
| Zr   | -6.90 | -1.64            | -1.45   | 4 | -1.04             |
| Nb   | -9.00 | -0.10            | -1.10   | 3 | -1.07             |
| Mo   | -8.08 | -0.52            | -0.20   | 3 | -0.03             |
| Ru   | -7.69 | -0.42            | 0.46    | 2 | 0.67              |
| Rh   | -5.24 | -1.18            | 0.60    | 2 | 1.19              |
| Pd   | -3.38 | -2.69            | 0.95    | 2 | 2.29              |
| Ag   | -2.53 | 0.07             | 0.80    | 1 | 0.73              |
| Sc-O | -6.34 | -8.35            | -2.08   | 3 | 0.70              |
| Ti-O | -5.16 | -4.89            | -1.63   | 2 | 0.81              |
| Zr-O | -6.90 | -9.09            | -1.45   | 4 | 0.82              |
| Nb-O | -9.00 | -9.26            | -1.10   | 3 | 1.99              |
| Mo-O | -8.08 | -8.10            | -0.20   | 3 | 2.50              |

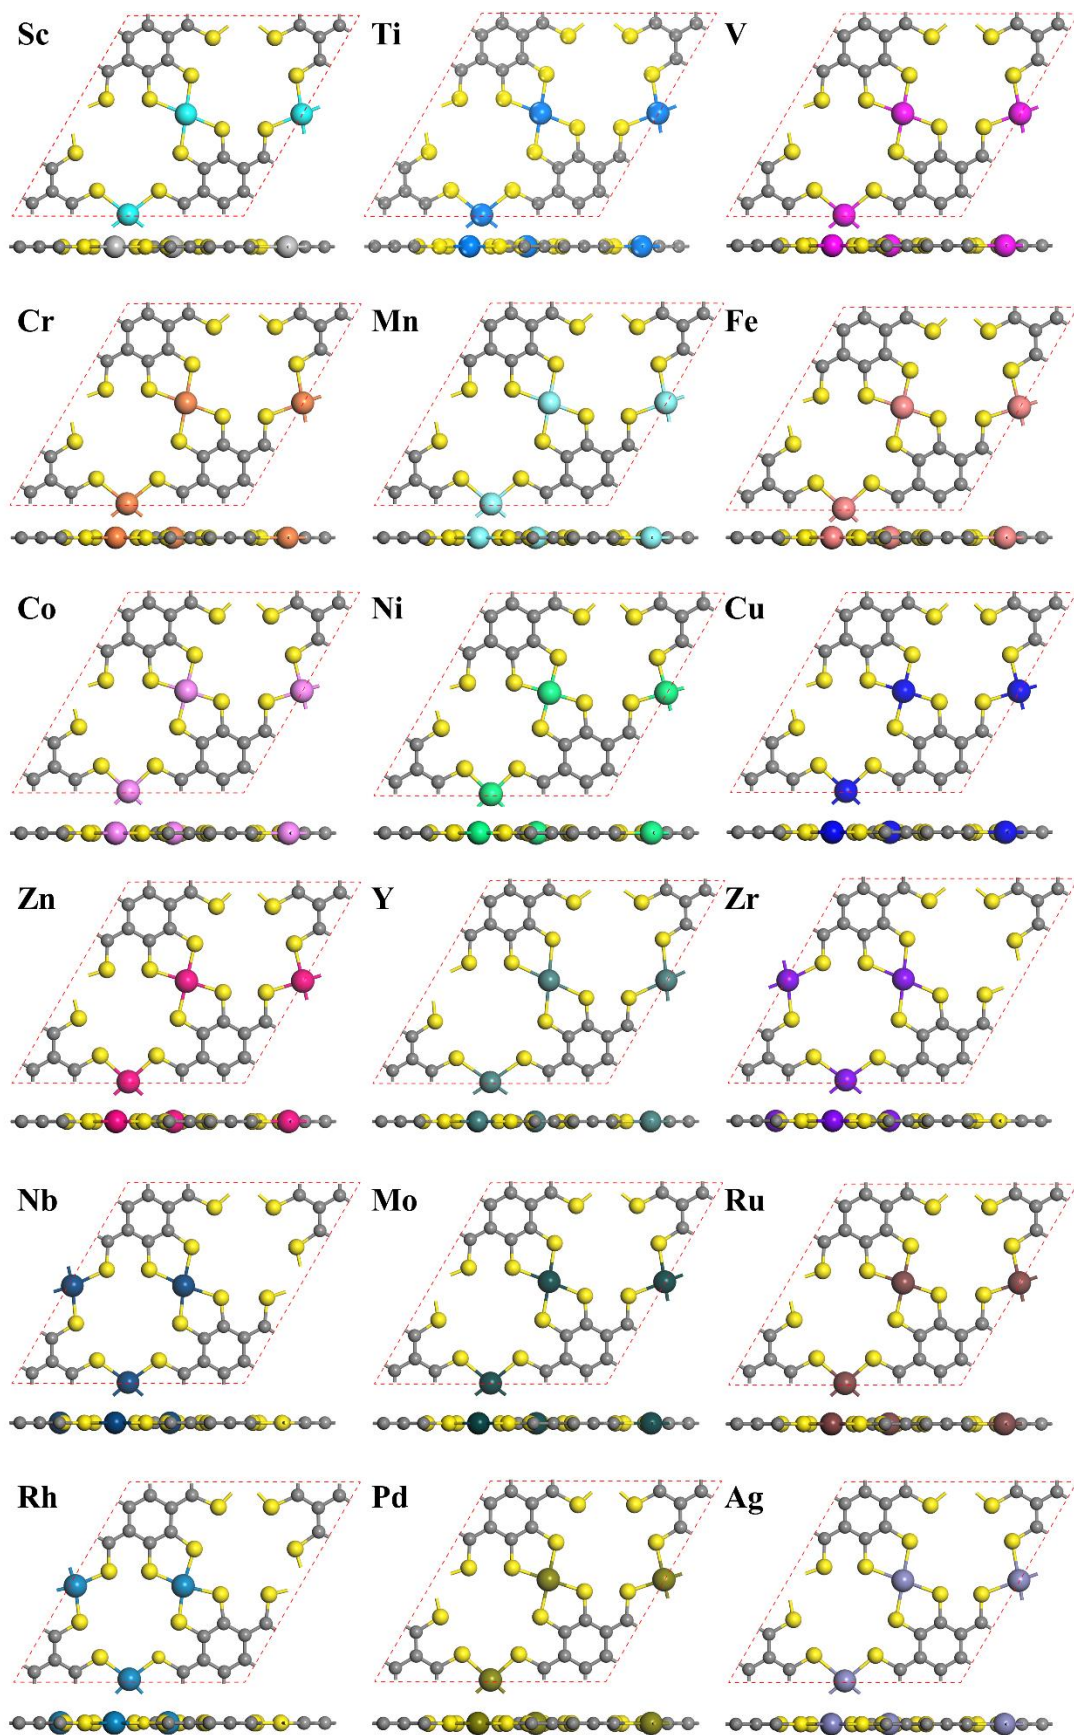

Figure S1. The optimized structures of TM-PTC.

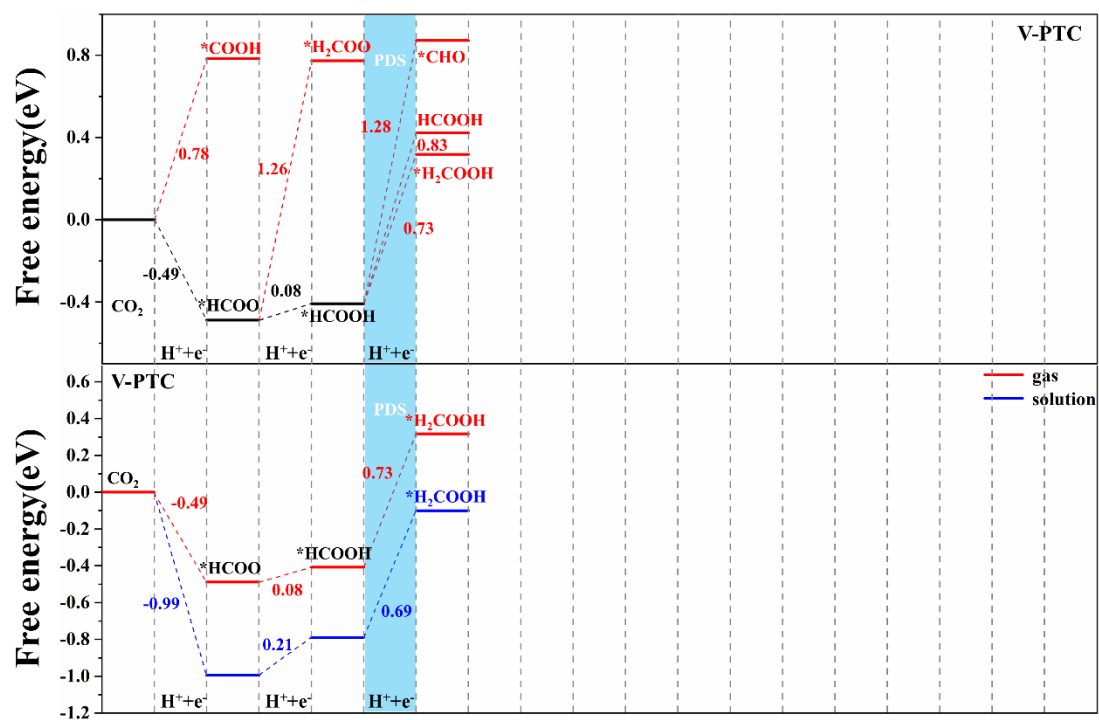

**Figure S2.** Free energy change for V-PTC in the gas phase (top), and the comparison of the free energy change both in the gas phase and in solution (bottom).

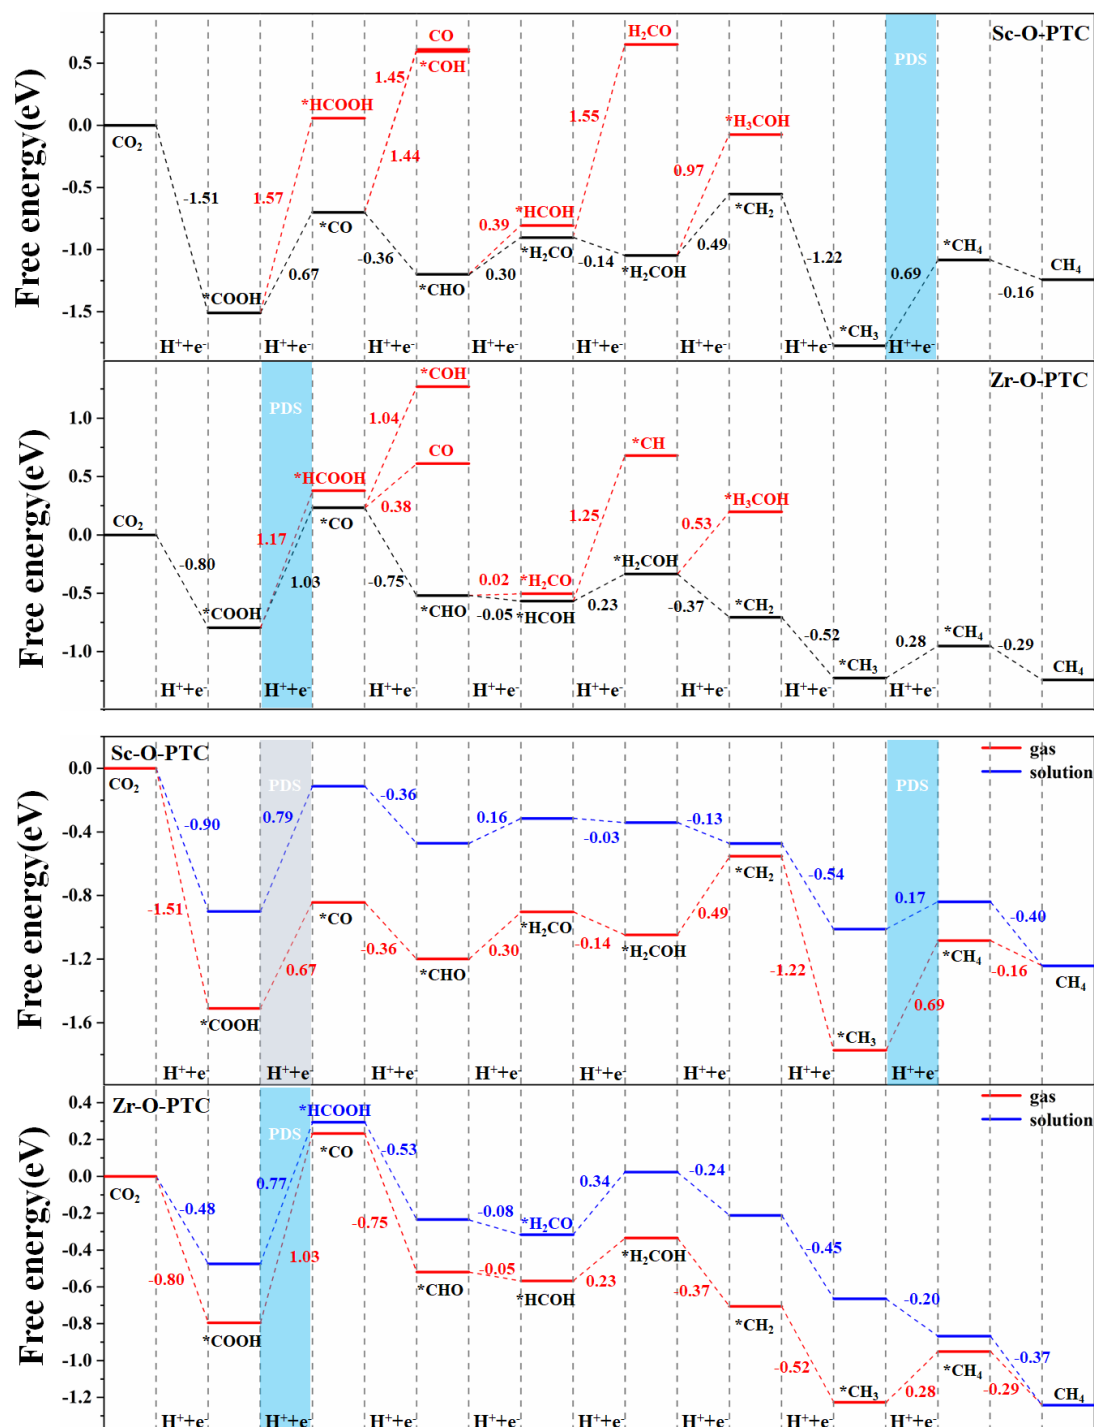

**Figure S3.** Free energy change in the gas phase (top two panels), and the comparison of the free energy change both in the gas phase and in solution (bottom two panels).
